# Supplementary material
Source: Springer Nature journal article supplement (https://www.springermedizin.de/resource/supplementary/12888_2012_1096_MOESM1_ESM.pdf/9478994)

Control>Sz

Left Superior Frontal Gyrus (BA9 & BA 6) / Left Inferior Frontal Gyrus (BA44/45)

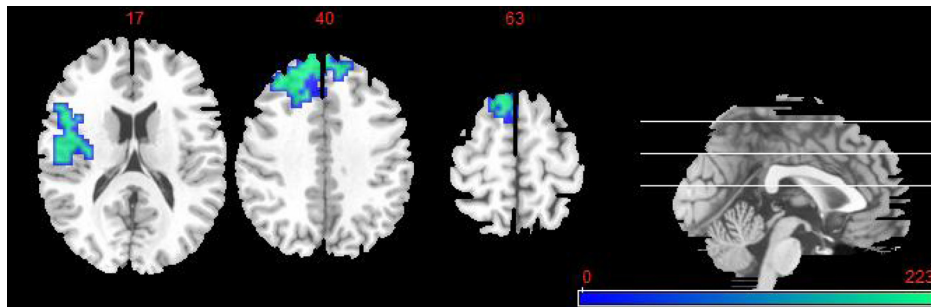

Sz > Control

Right Middle Frontal Gyrus (BA6) / Left Middle Temporal Gyrus (BA21)

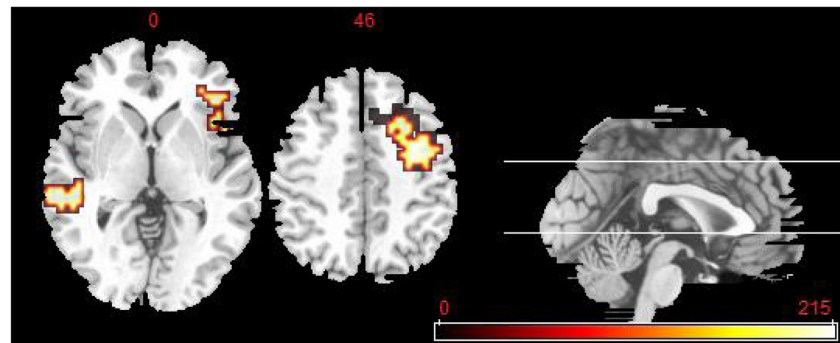

Supplement: MOESM1 [file 9478994]
